# Supplementary material for: Antiallergic Activity of 6-Deoxy-2-O-methyl-6-(N-hexadecanoyl)amino-l-ascorbic Acid
Source: MDPI journal article supplement (doi:10.3390/molecules26154684), 2021-08-03
Supplement: s1 [file s1]

## Supplementary materials

# Anti-allergic activity of 6-deoxy-2-*O*-methyl-6-(*N*-hexadecanoyl)amino-L-ascorbic acid

Kaori Miura <sup>1</sup>, Hiroaki Matsuno <sup>2</sup>, Yuji Iwaoka <sup>3</sup>, Hideyuki Ito <sup>3</sup> and Akihiro Tai <sup>2,4,\*</sup>

<sup>1</sup> LAIMU Corporation, 3-6-12 Shinyokohama, Kohoku-ku, Yokohama, Kanagawa 222-0033, Japan; miura@laimu.jp

<sup>2</sup> Faculty of Life and Environmental Sciences, Prefectural University of Hiroshima, 5562 Nanatsuka-cho, Shobara, Hiroshima 727-0023, Japan; q623021jw@ed.pu-hiroshima.ac.jp (H.M.)

<sup>3</sup> Faculty of Health and Welfare Science, Okayama Prefectural University, 111 Kuboki, Soja, Okayama 719-1197, Japan; iwaoka@fhw.oka-pu.ac.jp (Y.I.); hito@fhw.oka-pu.ac.jp (H.I.)

<sup>4</sup> Graduate School of Technology, Industrial and Social Sciences, Tokushima University, 2-1 Minami-josanjima, Tokushima 770-8506, Japan

\* Correspondence: atai@tokushima-u.ac.jp

## Contents:

Figure S1. <sup>1</sup>H NMR spectrum of 2-Me-6-Palm-AA

Figure S2. <sup>13</sup>C NMR spectrum of 2-Me-6-Palm-AA

Figure S3. <sup>1</sup>H NMR spectrum of 2-Me-6-*N*-Palm-AA

Figure S4. <sup>13</sup>C NMR spectrum of 2-Me-6-*N*-Palm-AA

<sup>1</sup>H NMR (CD<sub>3</sub>OD, 600 MHz)

2-Me-6-Palm-AA

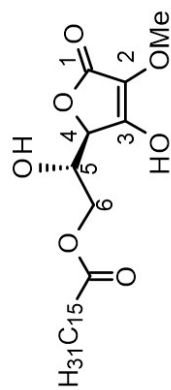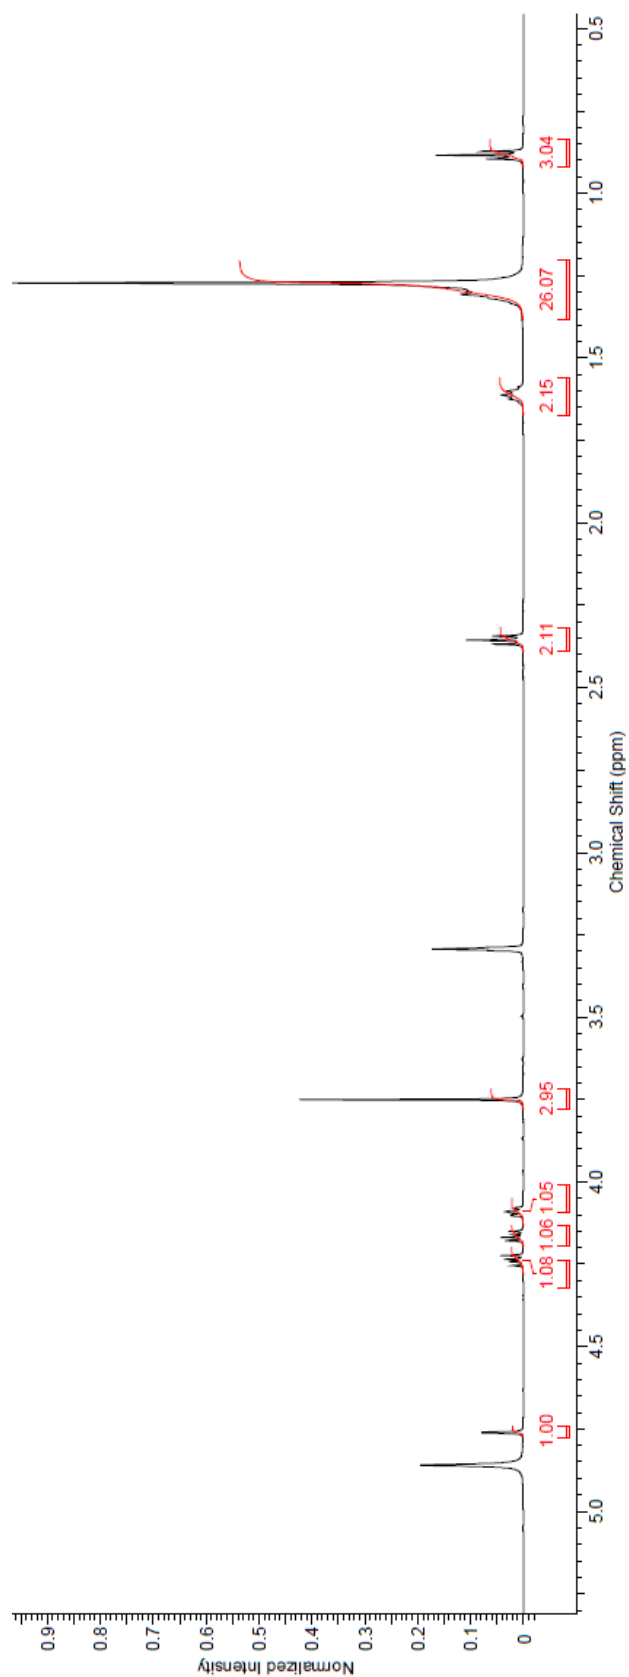

**Figure S1.** <sup>1</sup>H NMR spectrum of 2-Me-6-Palm-AA

$^{13}\text{C}$  NMR ( $\text{CD}_3\text{OD}$ , 150 MHz)

2-Me-6-Palm-AA

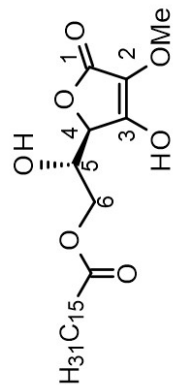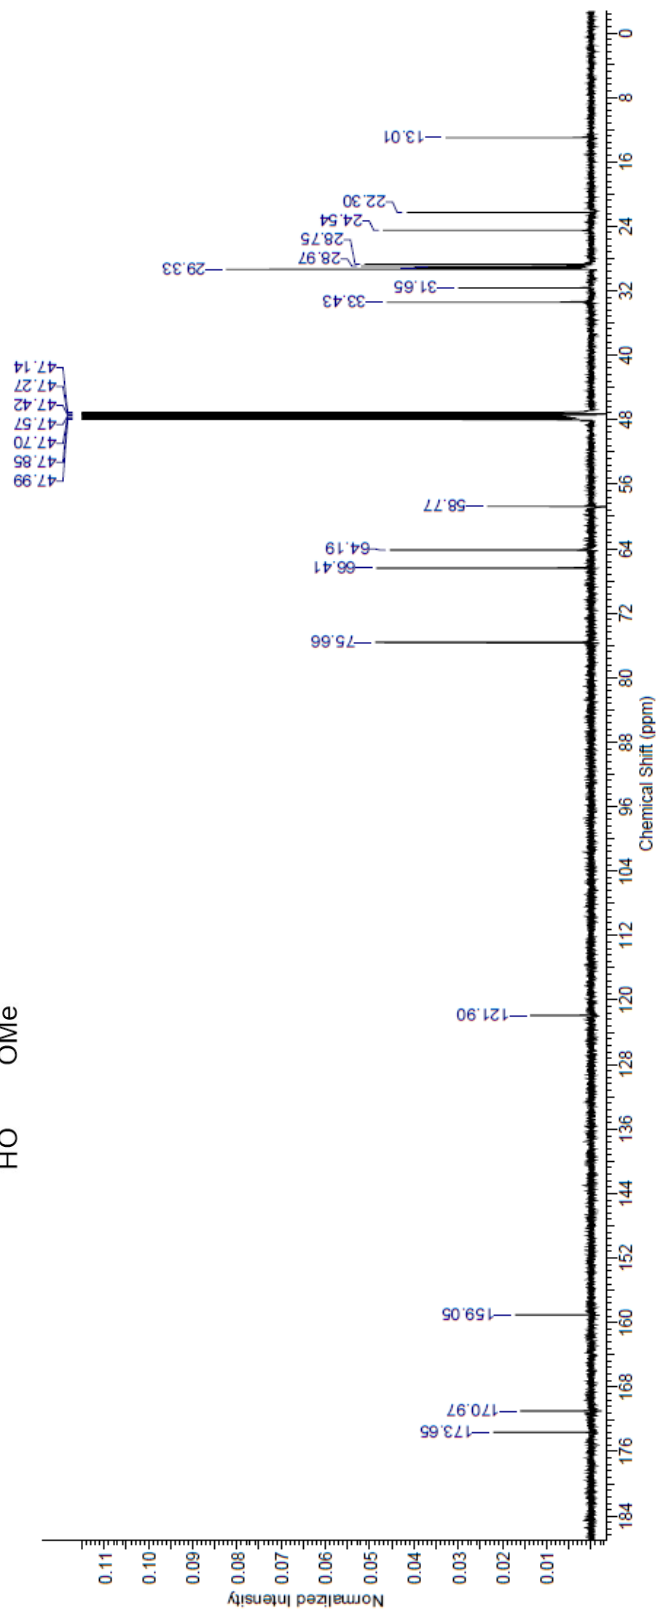

**Figure S2.**  $^{13}\text{C}$  NMR spectrum of 2-Me-6-Palm-AA

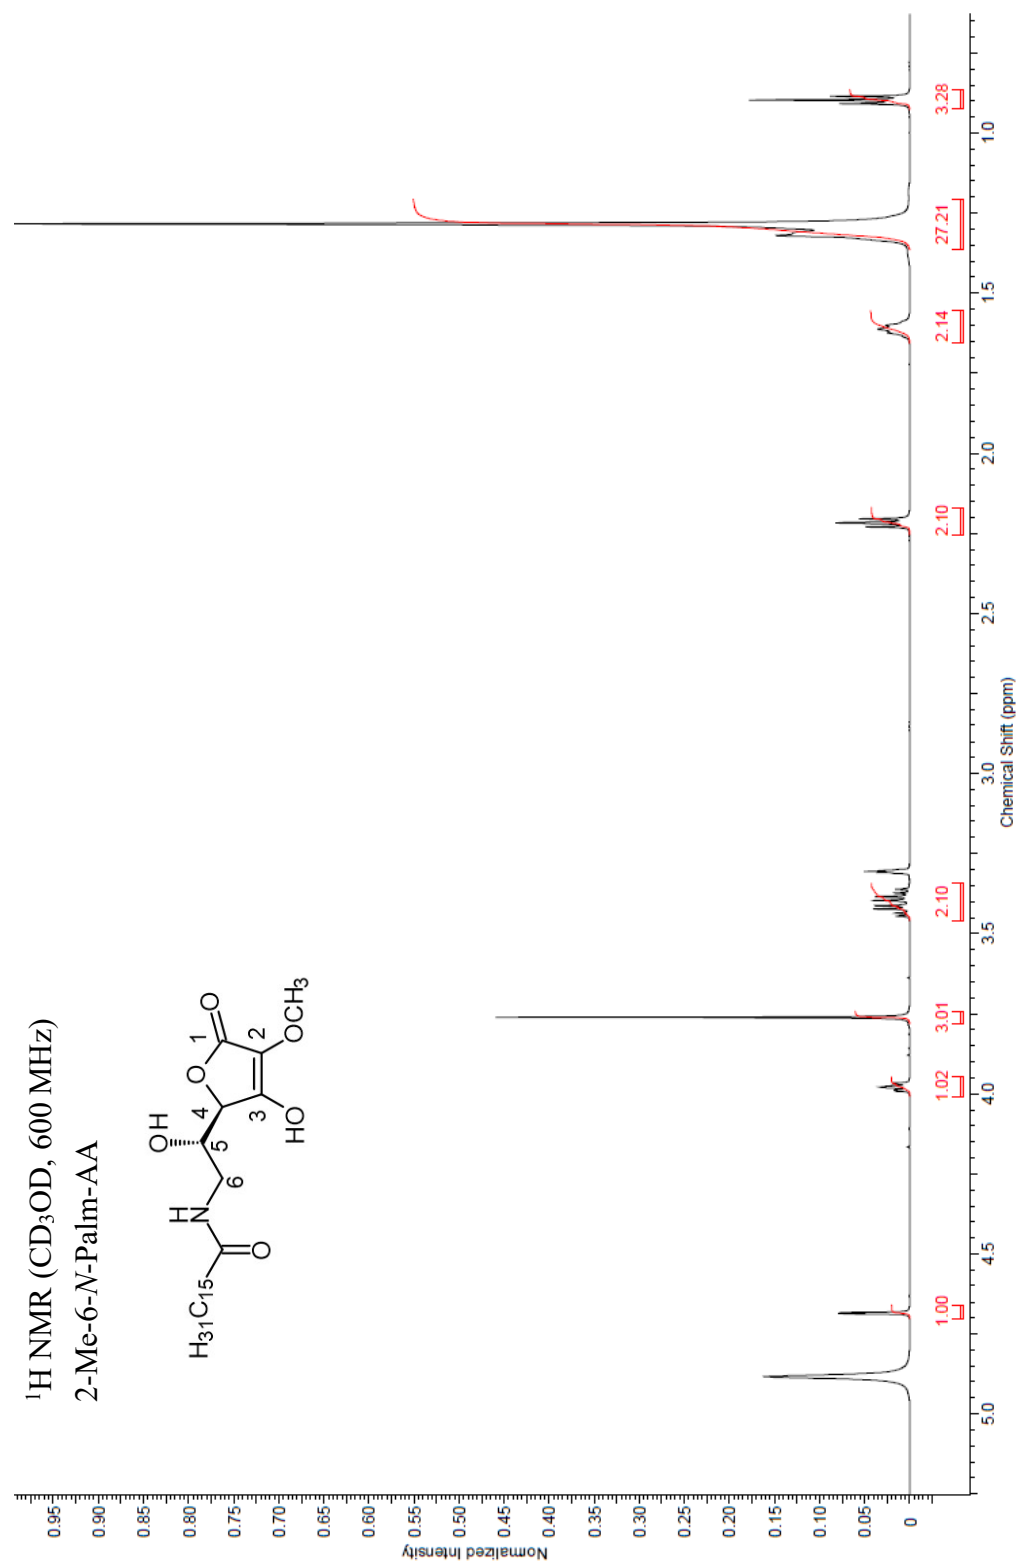

**Figure S3.** <sup>1</sup>H NMR spectrum of 2-Me-6-*N*-Palm-AA

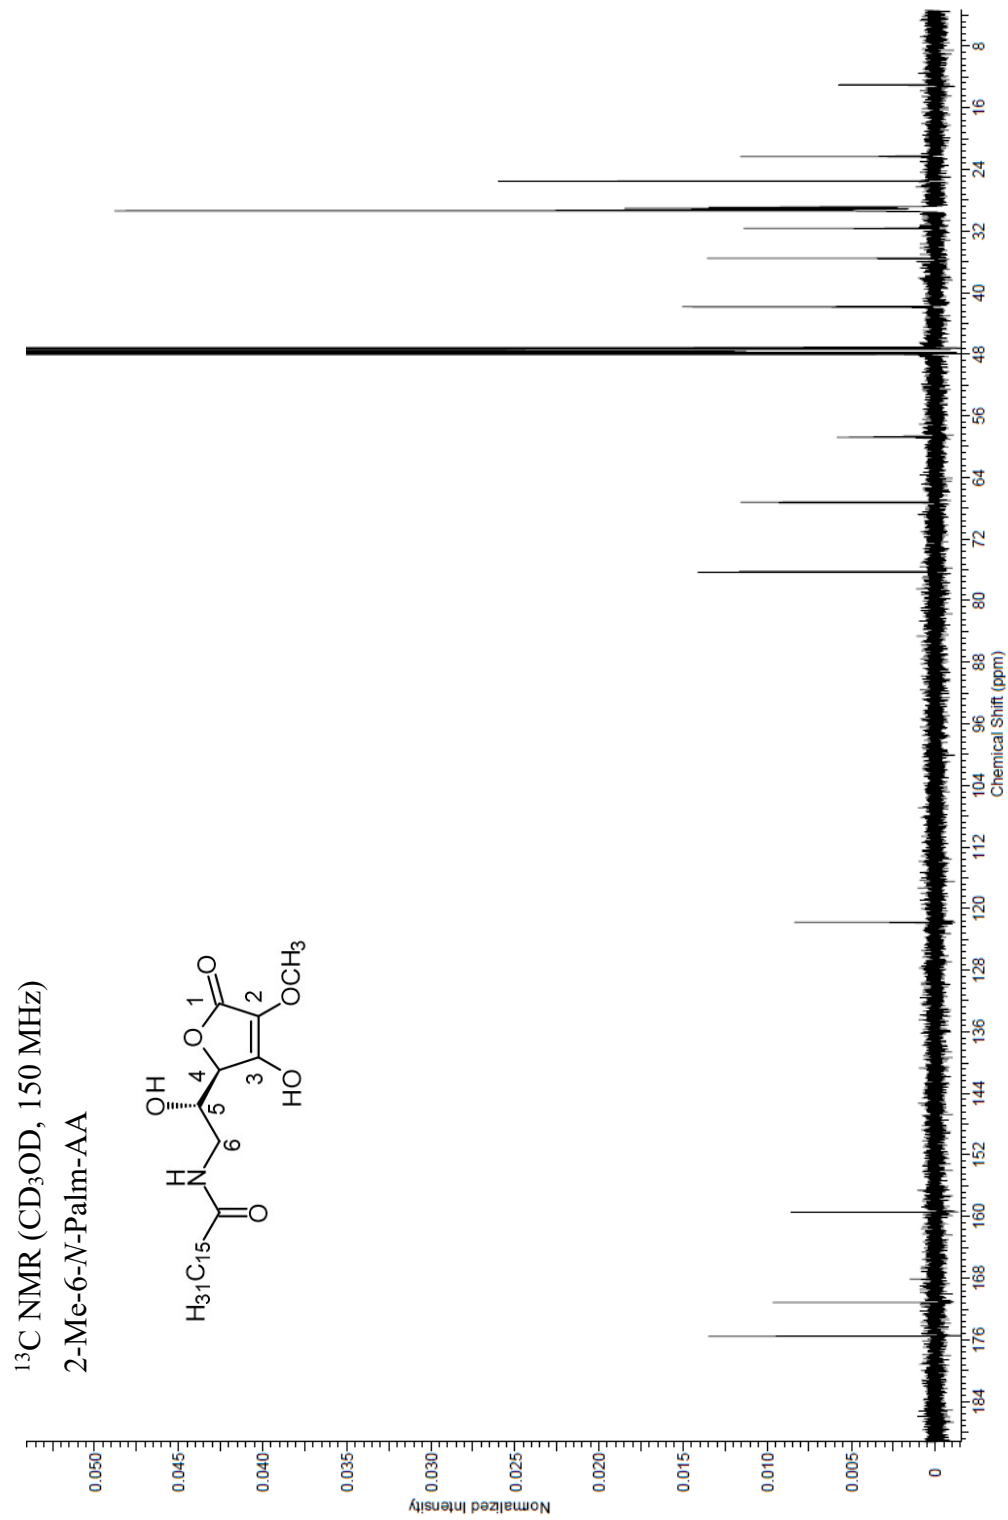

**Figure S4.**  $^{13}\text{C}$  NMR spectrum of 2-Me-6-*N*-Palm-AA
